# Supplementary material for: Efficacy of Kairomone Lures to Attract Parasitoids of Halyomorpha halys
Source: MDPI journal article supplement (doi:10.3390/insects14020125), 2023-01-25
Supplement: s1 [file s1]

**Table S1.** Statistical results from Kruskal-Wallis tests to compare each egg fate category differences across treatment lure types.

| <b>Egg Fate</b>               | <b><math>X^2</math></b> | <b><math>df</math></b> | <b><math>p</math></b> |
|-------------------------------|-------------------------|------------------------|-----------------------|
| Hatched <i>H. halys</i>       | 2.79                    | 3                      | 0.426                 |
| Missing                       | 2.06                    | 3                      | 0.561                 |
| Empty                         | 0.98                    | 3                      | 0.806                 |
| Sunken                        | 1.21                    | 3                      | 0.751                 |
| Predated                      | 0.22                    | 3                      | 0.974                 |
| Unhatched <i>H. halys</i>     | 6.62                    | 3                      | 0.085                 |
| Undeveloped parasitoid        | 5.68                    | 3                      | 0.128                 |
| <i>T. euschisti</i> emergence | 3.00                    | 3                      | 0.392                 |
| <i>T. japonicus</i> emergence | 4.01                    | 3                      | 0.260                 |
